# Supplementary material
Source: MDPI journal article supplement (https://www.mdpi.com/search?q=catalysts-08-00563)
Supplement: s001 [file catalysts-08-00563-s001.pdf]

# Supplementary Materials: Promotional Effect of Gold on the WGS Activity of Alumina-Supported Copper-Manganese Mixed Oxides

Tatyana Tabakova <sup>1,\*</sup>, Ivan Ivanov <sup>1</sup>, Yordanka Karakirova <sup>1</sup>, Daniela Karashanova <sup>2</sup>, Anna Maria Venezia <sup>3</sup>, Petya Petrova <sup>1</sup>, Georgi Avdeev <sup>4</sup>, Elitsa Kolentsova <sup>5</sup> and Krasimir Ivanov <sup>5</sup>

<sup>1</sup> Institute of Catalysis, Bulgarian Academy of Sciences, 1113 Sofia, Bulgaria; bogoev@ic.bas.bg (I.I.); daniepr@ic.bas.bg (Y.K.); petia@ic.bas.bg (P.P.)

<sup>2</sup> Institute of Optical Materials and Technologies, Bulgarian Academy of Sciences, 1113 Sofia, Bulgaria; dkarashanova@gmail.com

<sup>3</sup> Istituto per lo Studio dei Materiali Nanostrutturati, CNR, 90146 Palermo, Italy; annamaria.venezia@ismn.cnr.it

<sup>4</sup> Institute of Physical Chemistry, Bulgarian Academy of Sciences, 1113 Sofia, Bulgaria; g\_avdeev@ipc.bas.bg

<sup>5</sup> Department of Chemistry, Agricultural University, 4000 Plovdiv, Bulgaria; elitsa\_kolentsova@abv.bg (E.K.); kivanov1@abv.bg (K.I.)

\* Correspondence: tabakova@ic.bas.bg; Tel.: +359-297-925-28

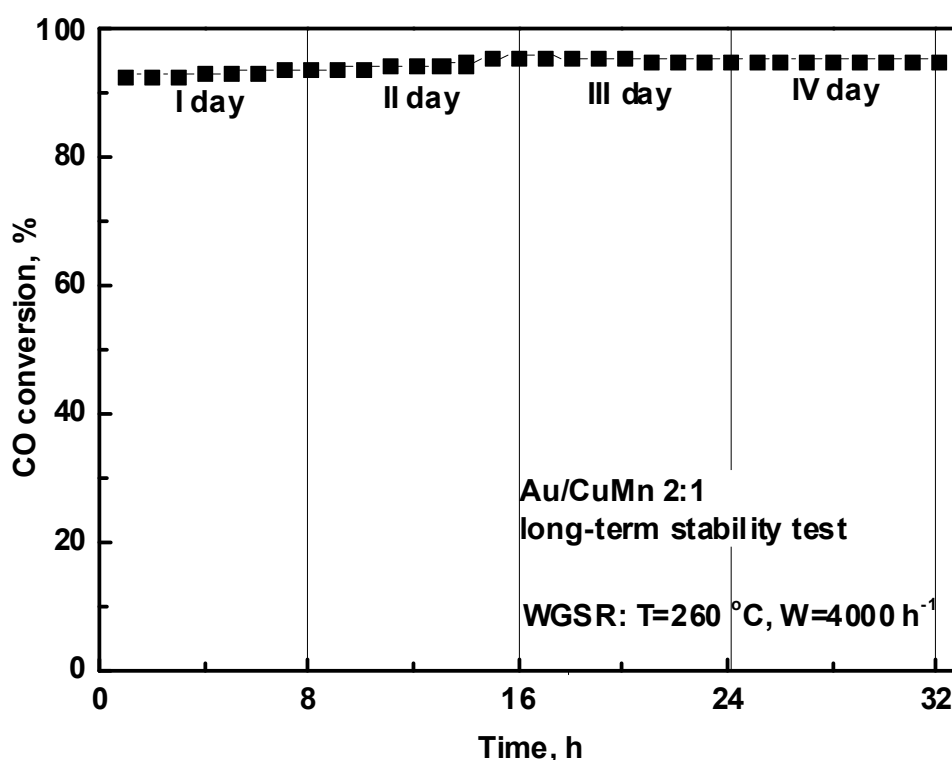

Figure S1. Stability test of Au/CuMn (2:1) catalyst performed for 32 h at 260 °C.

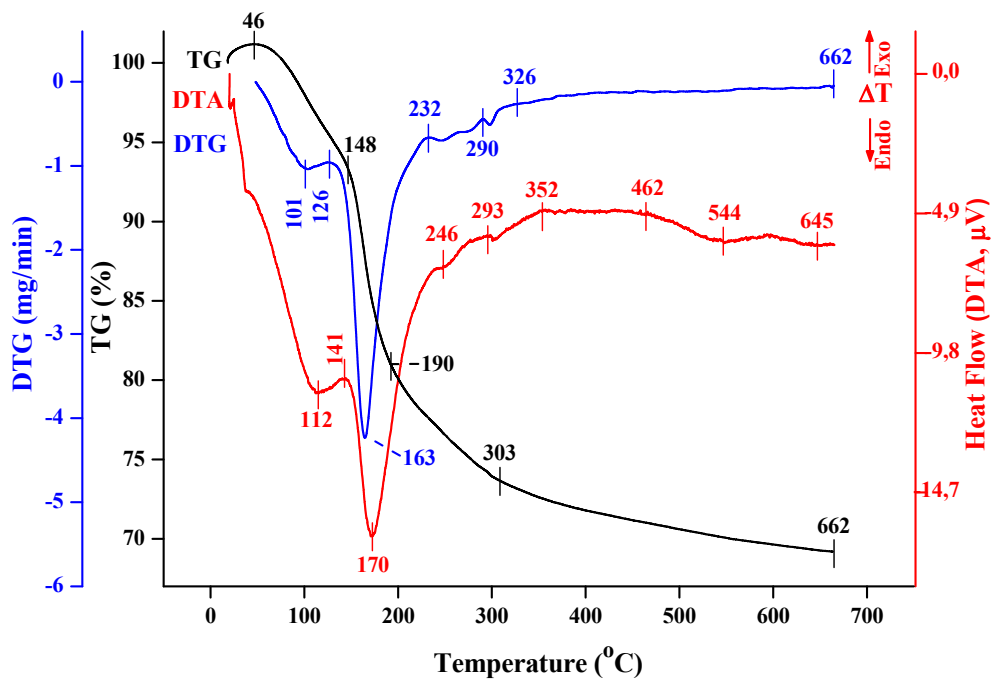

(a)

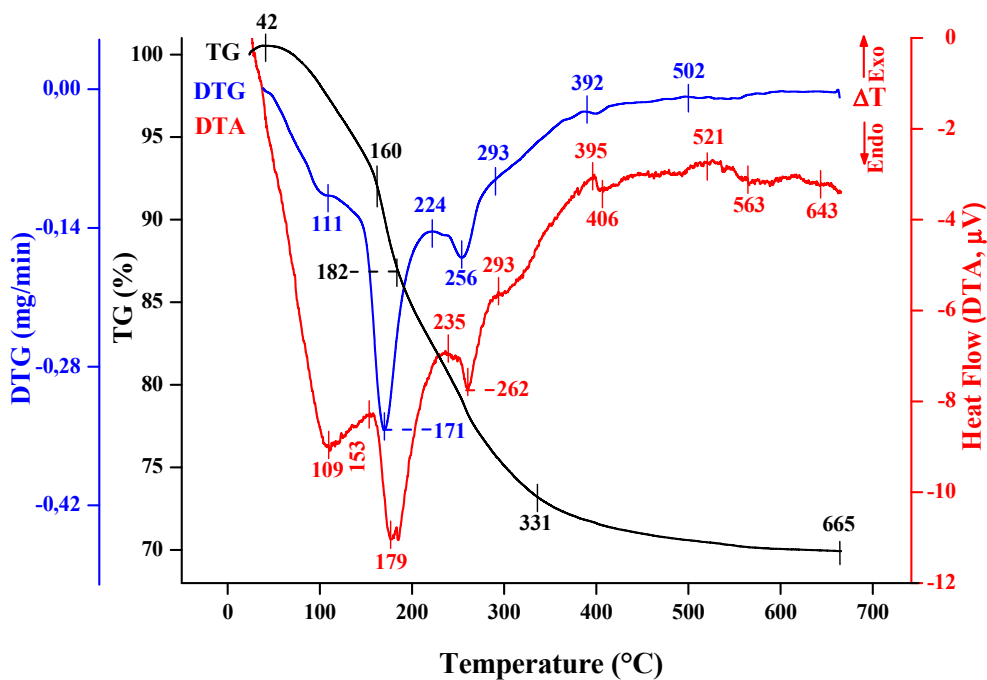

(b)

Figure S2. Thermal analysis of: (a) CuMn 2:1, (b) CuMn 1:5.

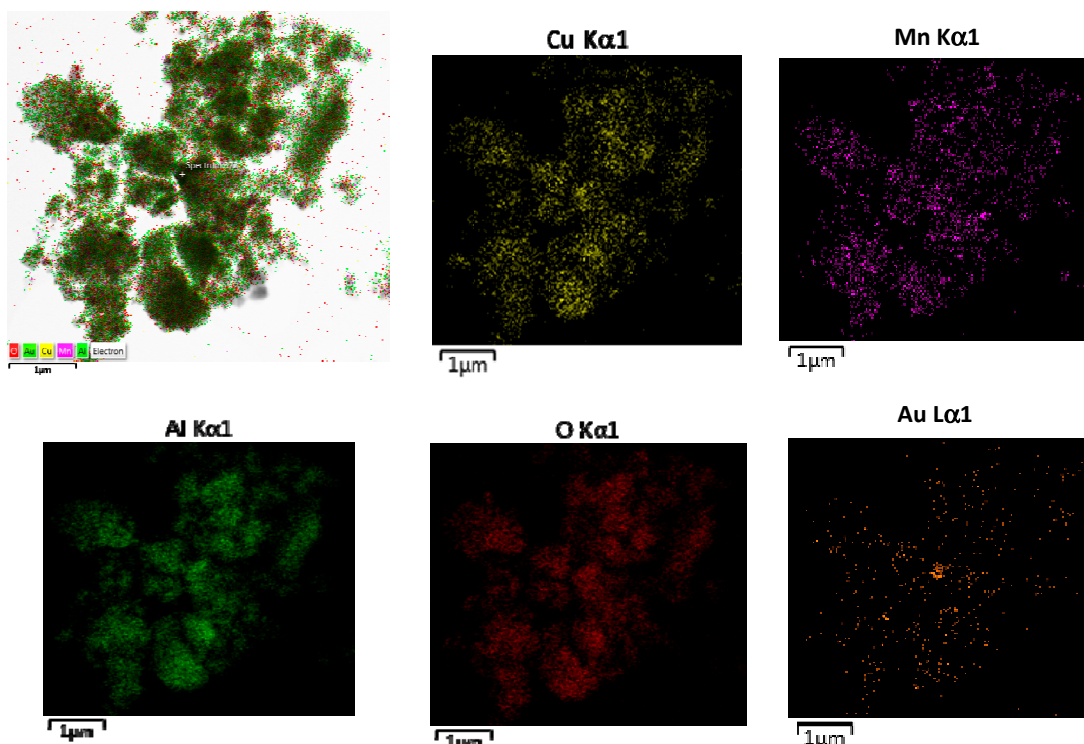

**Figure S3.** Representative STEM image of: Au/CuMn 2:1 catalyst and relative XEDX mapping distribution of all components.

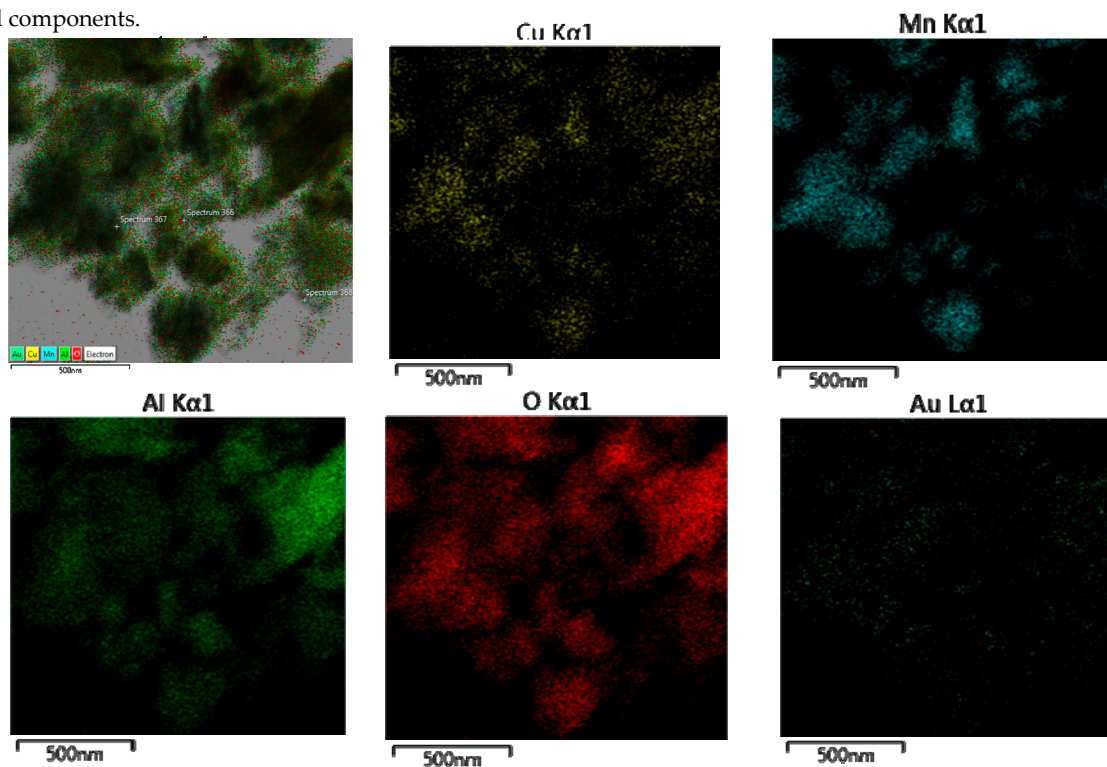

**Figure S4.** Representative STEM image of: Au/CuMn 1:5 catalyst and relative XEDX mapping distribution of all components.

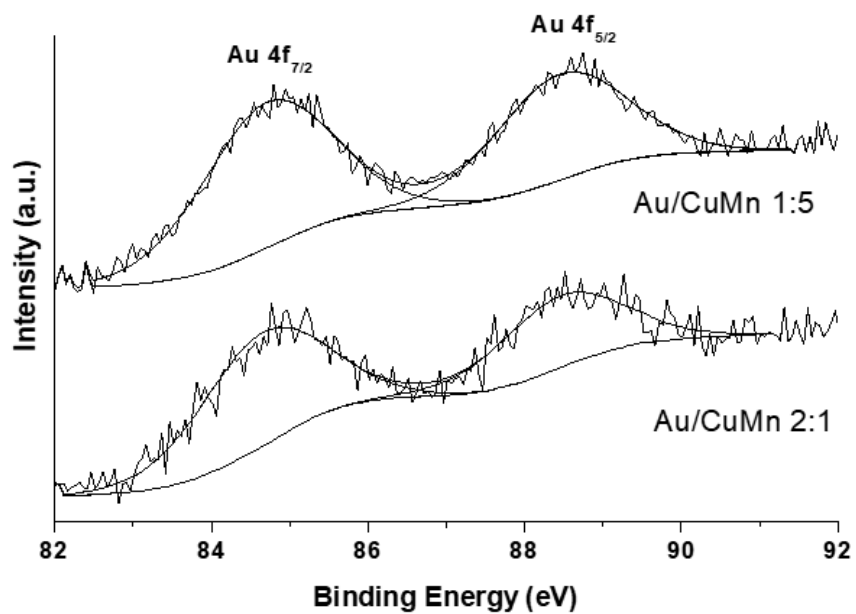

Figure S5. Au 4f XP spectra of gold catalysts on alumina supported CuMn mixed oxides.
